# Supplementary material for: Tumor targeting and therapeutic assessments of RNA nanoparticles carrying α9-nAChR aptamer and anti-miR-21 in triple-negative breast cancers
Source: PubMed Central journal article supplement — Mol Ther Nucleic Acids. 2023 Jul 15;33:351–66. doi: 10.1016/j.omtn.2023.07.013 (PMC10400867; doi:10.1016/j.omtn.2023.07.013), 2023-07-15
Supplement: mmc1.pdf [file mmc1.pdf]

OMTN, Volume 33

## Supplemental information

### **Tumor targeting and therapeutic assessments of RNA nanoparticles carrying $\alpha 9$ -nAChR aptamer and anti-miR-21 in triple-negative breast cancers**

**You-Cheng Liao, Tzu-Chun Cheng, Shih-Hsin Tu, Jungshan Chang, Peixuan Guo, Li-Ching Chen, and Yuan-Soon Ho**

**Table S1. Sequences for construction of 3WJ RNA nanoparticles**

|                        | Sequence                                                                                                                                                      |
|------------------------|---------------------------------------------------------------------------------------------------------------------------------------------------------------|
| A3WJ, 2'F RNA          | 5'-GcG uGc uGG uGc uAc-3'                                                                                                                                     |
| B3WJ, 2'F RNA          | 5'-CGG UAG CAC GGG CUG UGC G-3'                                                                                                                               |
| C3WJ, 2'F RNA          | 5'-cGc AcA Gcc AGc AcG c-3'                                                                                                                                   |
| B3WJ-Alpha9, 2'F RNA:  | 5'-CGG UAG CAC GGG CUG UGC G GGG AGA Auu cAA cuG<br>ccA ucu AGG cGc uAG uAG ccu cAG cAG cAu AGu uuc Gcc<br>Gcu AuG cAG uAA GuA cuA cAA Gcu ucu GGA cuc GGu-3' |
| AF647-C3WJ, 2'F RNA    | 5'- A647- cGc AcA Gcc AGc AcG c-3'                                                                                                                            |
| AF647-B3WJ, 2'F RNA    | 5'- A647- CGG UAG CAC GGG CUG UGC G-3'                                                                                                                        |
| Alpha9- C3WJ, 2'F RNA: | 5'- GGG AGA Auu cAA cuG ccA ucu AGG cGc uAG uAG ccu<br>cAG cAG cAu AGu uuc Gcc Gcu AuG cAG uAA GuA cuA cAA<br>Gcu ucu GGA cuc GGu cGc AcA Gcc AGc AcG c-3     |
| A3WJ -Sph1, 2'F RNA    | 5'-GcG uGc uGG uGc uAc cGA ucc cGc GGc cAu GGc GGc cG G<br>GAG-3'                                                                                             |
| Sph1-anti21 DNA        | 5'-+G+A+T+A+A+G+C+T CTC CCG GCC GCC ATG GCC GCG<br>GGA T-3'                                                                                                   |
| Sph1-antiscr 2'F RNA   | 5'-cuc ccG Gcc Gcc AuG Gcc GcG GGA u-3'                                                                                                                       |

\*Note: Lower case c and u indicate 2'F modified.

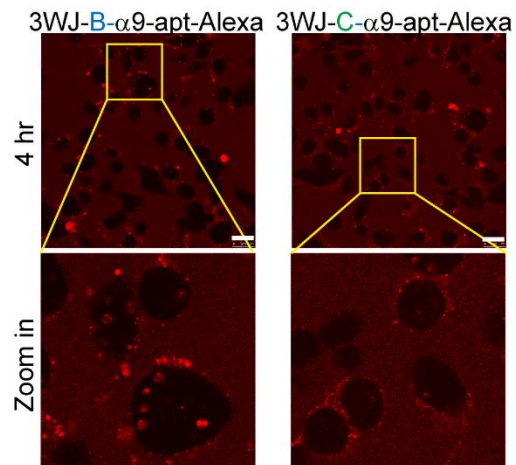

**Figure S1. Live cell images of 3WJ-B- $\alpha$ 9-apt-Alexa and 3WJ-C- $\alpha$ 9-apt-Alexa RNA nanoparticles at 4 hours treatment in TNBC cells.** Time-lapse fluorescence live cell images of MDA-MB-231 cells after treatment with 3WJ-B- $\alpha$ 9-apt-Alexa (left) or 3WJ-C- $\alpha$ 9-apt-Alexa (right) RNA nanoparticles. Scale bar=25  $\mu$ m

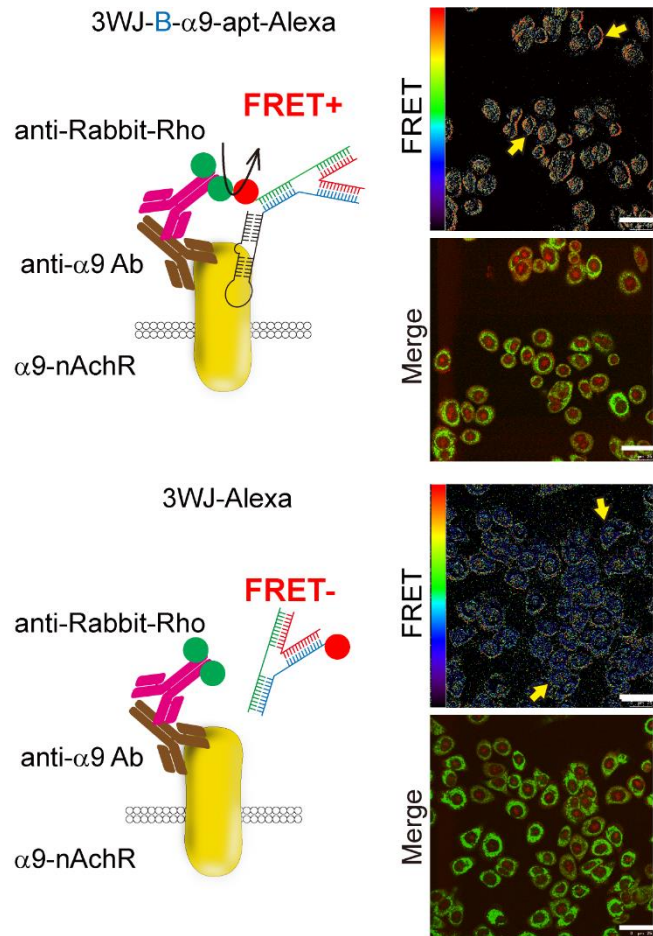

**Figure S2. Confocal microscopy of specific interactions between 3WJ-B- $\alpha$ 9-apt-Alexa RNA nanoparticles and  $\alpha$ 9-nAChR in HER2+ breast cancer cells.** Confocal microscopy FRET analysis comparing the specific binding of 3WJ-B- $\alpha$ 9-apt-Alexa and 3WJ-Alexa RNA nanoparticles (10nM, 1 hr) to  $\alpha$ 9-nAChR in SKBR3 cells. Yellow arrows indicate a positive FRET signal. The red/blue spectrum indicates the intensity of FRET efficiency. Scale bar=25  $\mu$ m. Green:  $\alpha$ 9-nAChR, Red: RNA nanoparticle

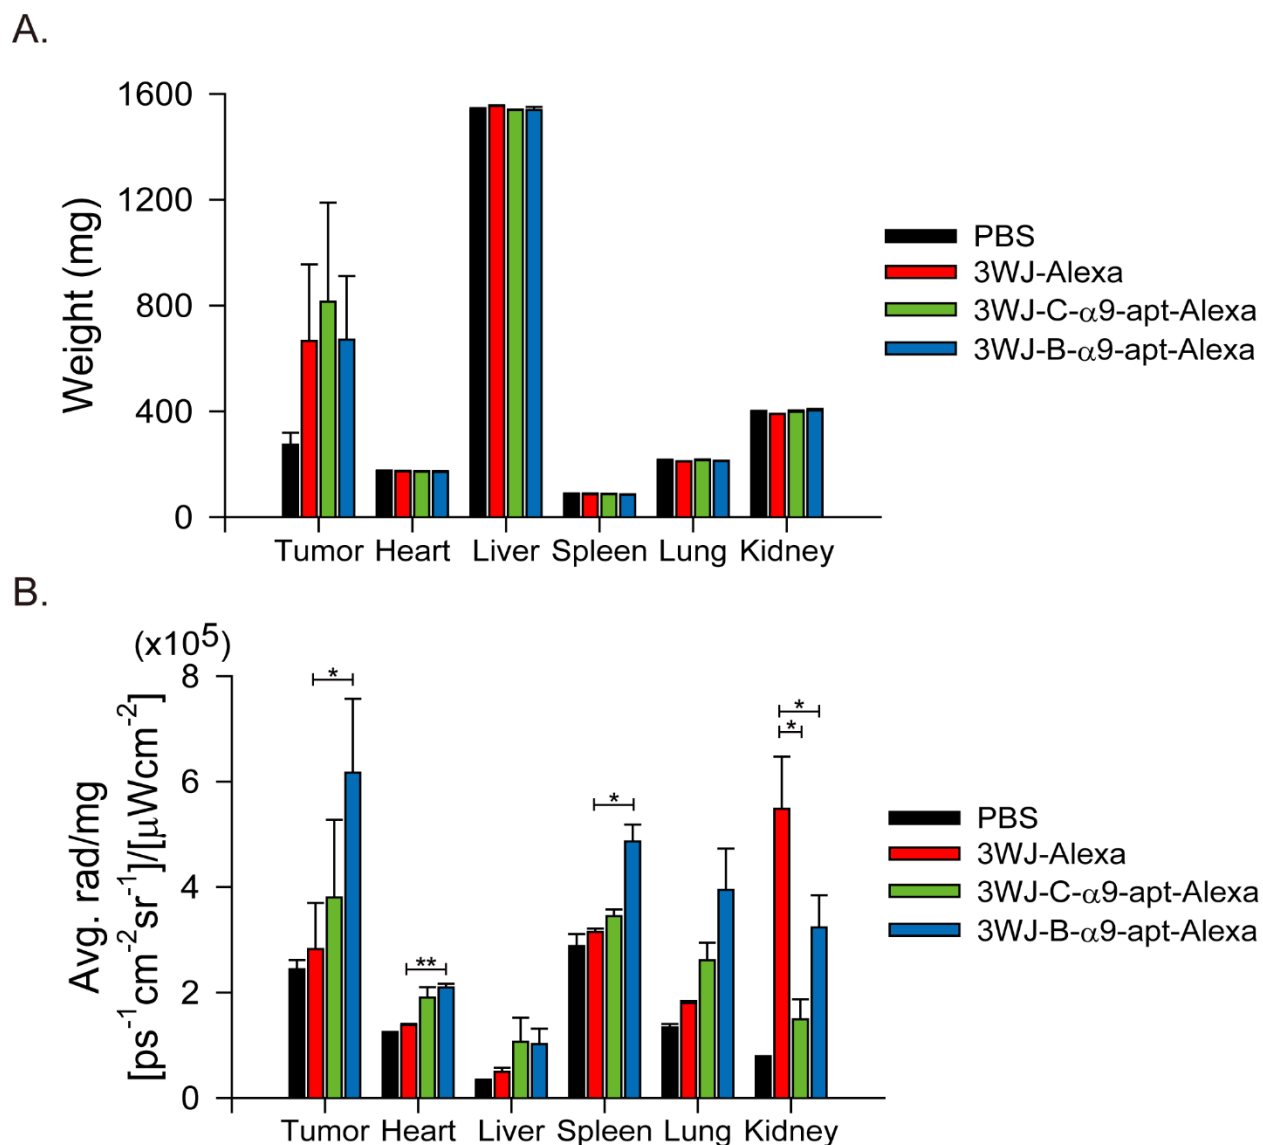

**Figure S3. Quantitative analysis of the intensity of 3WJ-B- $\alpha$ 9-apt-Alexa RNA nanoparticles in organs with normalizing against organ weight.** (A) The tumor and organs weights were measured by a microbalancer after IVSIS florescent images were acquired. (B) RNA nanoparticles including 3WJ-B- $\alpha$ 9-apt-Alexa, 3WJ-C- $\alpha$ 9-apt-Alexa and 3WJ-Alexa uptake of organs and tumors were also calculated by dividing the average radiant efficiency (Avg) with the weights (mg) of each analyzed organ for each group of mice. (n = 3 biologically independent animals, statistics was calculated by two-tailed unpaired t-test presented as mean  $\pm$  SEM, \*: p<0.05, \*\*: p<0.001)

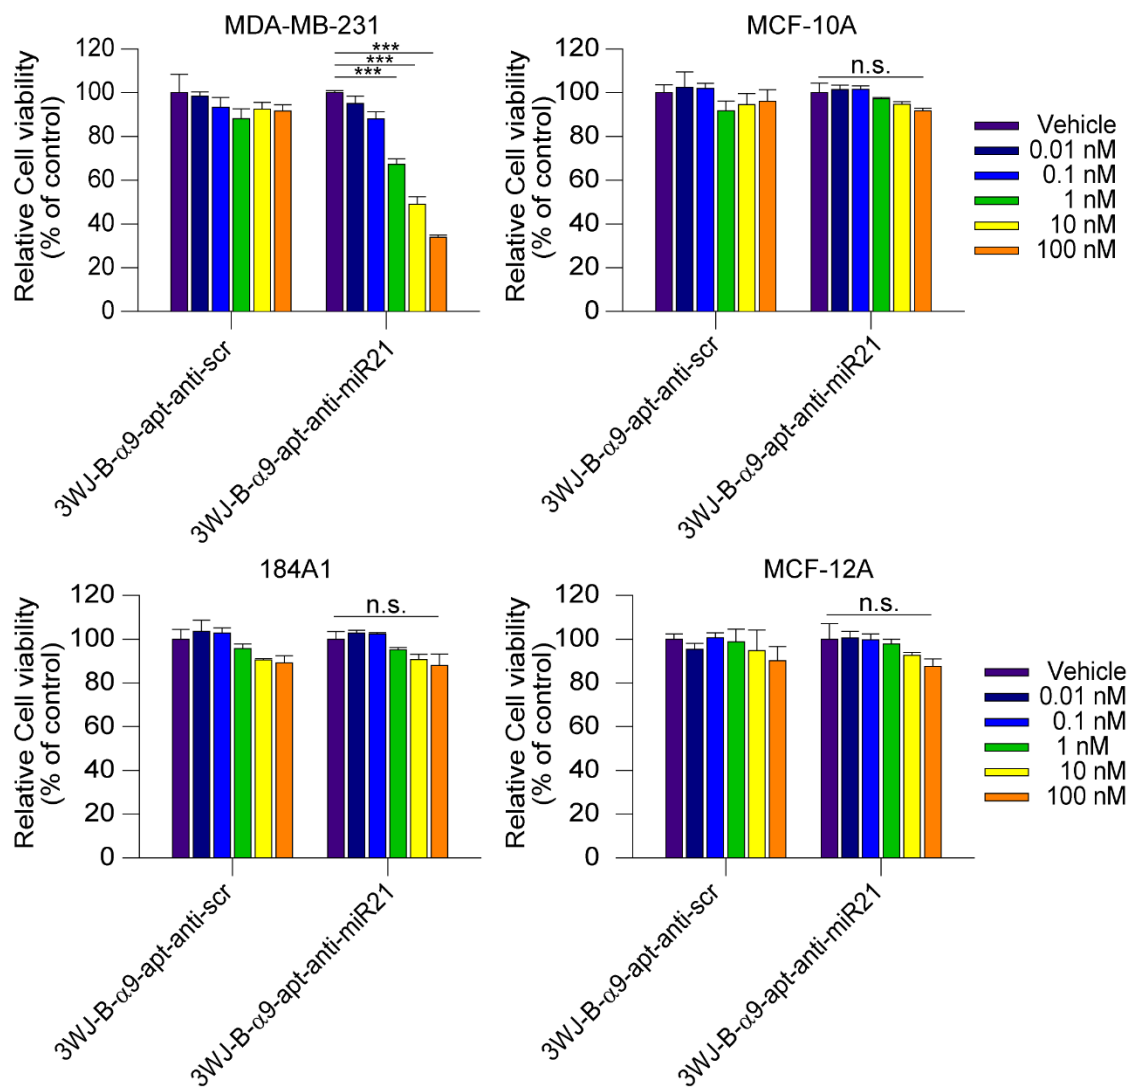

**Figure S4. 3WJ-B- $\alpha$ 9-apt-anti-miR21 RNA nanoparticles cytotoxicity evaluation in normal mammary epithelial cells.** 3WJ-B- $\alpha$ 9-apt-anti-miR21 and 3WJ-B- $\alpha$ 9-apt-anti-scr RNA nanoparticles (0.01-100nM) treated normal mammary epithelial cells (MCF10A, MCF-12A and 184A1) and MDA-MB-231 cancer cell. Cell viability assessment was performed 48 h after drug treatment using the MTT assay. (n=4 independent samples, statistics were calculated by two-tailed unpaired t-test presented as mean  $\pm$  SD, \*p < 0.05, \*\*p < 0.01, \*\*\*p < 0.001, n.s. No significance).

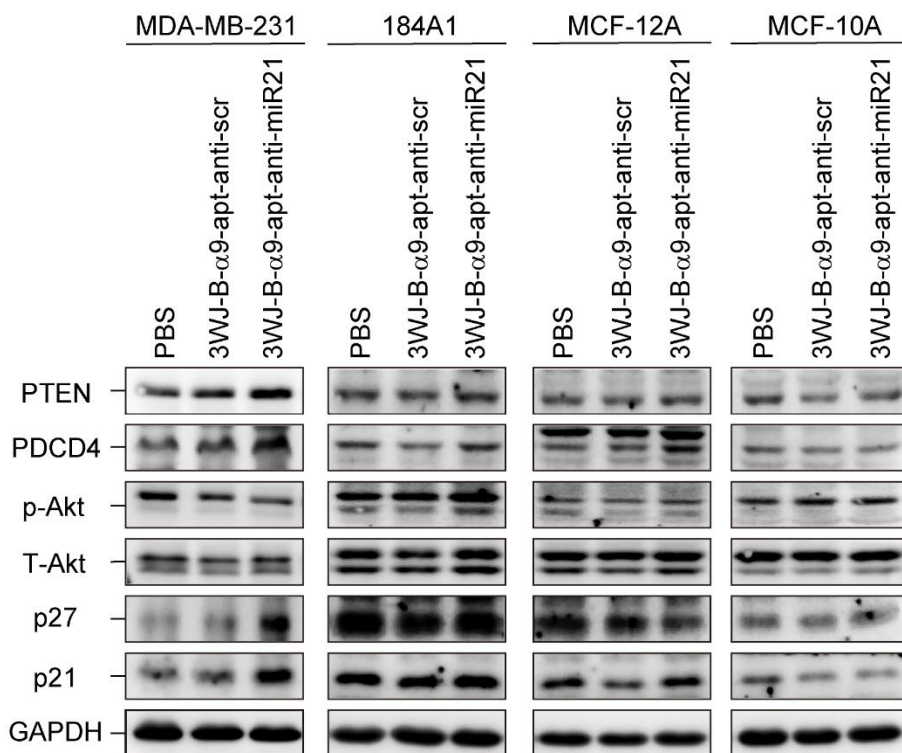

**Figure S5. Protein changes induced by miR21 silencing by 3WJ-B- $\alpha$ 9-apt-anti-miR21 RNA nanoparticles in normal breast epithelium and cancer cells.** Detection of miR21 downstream targets in MCF-12A, 184 A1, and MCF-10A normal cells and MDA-MB-231 cancer cells treated with 3WJ-B- $\alpha$ 9-apt-anti-miR21 and 3WJ-B- $\alpha$ 9-apt-anti-scr RNA nanoparticles (10 nM, 48 hours) Protein expression including PTEN, PDCD4, p-Akt, T-Akt, p21, and p27 was detected by western blot.

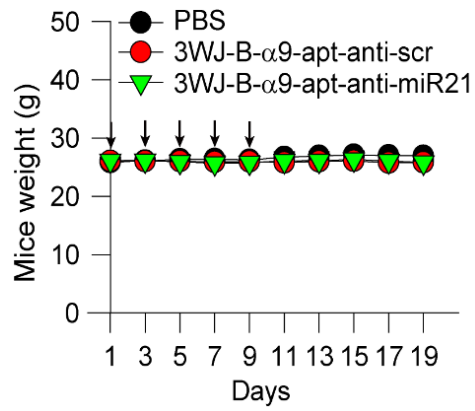

**Figure S6. 3WJ-B- $\alpha$ 9-apt-anti-miR21 RNA nanoparticles safety assessment of body weight changes in an in vivo PDX-TNBC model.**
